# Supplementary material for: Rosiglitazone ameliorates palmitic acid-induced cytotoxicity in TM4 Sertoli cells
Source: PubMed Central journal article supplement (PMC6192158; doi:10.1186/s12958-018-0416-0), 2018-10-17
Supplement: 12958_2018_416_MOESM1_ESM.pdf [file 12958_2018_416_MOESM1_ESM.pdf]

**Additional file 1**

**Rosiglitazone ameliorates palmitic acid-induced cytotoxicity  
in TM4 Sertoli cells**

Xie Ge <sup>1†</sup>, Peng Pan <sup>1†</sup>, Jun Jing <sup>1</sup>, Xuechun Hu <sup>1</sup>, Li Chen <sup>1</sup>, Xuhua Qiu <sup>1</sup>, Rujun Ma <sup>1</sup>,  
Kadiliya Jueraitetibaiké <sup>1</sup>, Xuan Huang <sup>1</sup> and Bing Yao <sup>1\*</sup>

<sup>1</sup> Center of Reproductive Medicine, Nanjing Jinling Hospital, Clinical School of  
Medical College, Nanjing University, Nanjing 210002, Jiangsu, China.

<sup>†</sup> These authors contributed equally to this work.

\* Author to whom correspondence should be addressed; E-Mail: [yaobing@nju.edu.cn](mailto:yaobing@nju.edu.cn);

Tel.: +86-25-8086-0174; Fax: +86-25-8086-0174.

## Supplementary Results

### Supplementary Figures

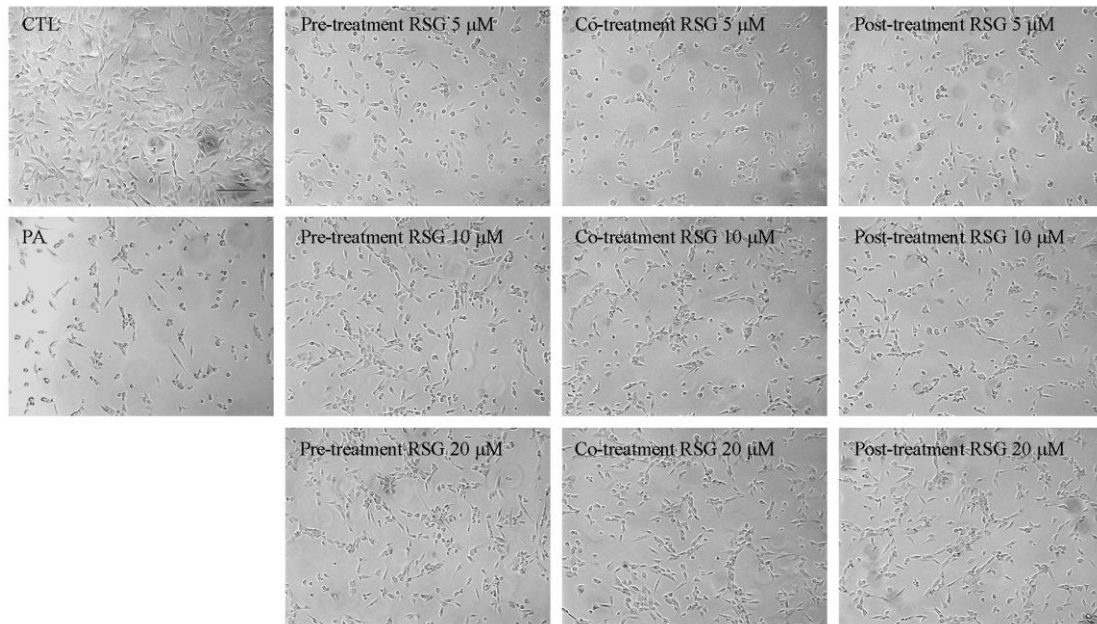

**Figure S1.** Dose- and time-dependent analysis of the effect of RSG on PA-induced cytotoxicity (cell morphological observations). TM4 cells were treated with RSG at the indicated concentrations 2 h before (Pre-treatment), simultaneously with (Co-treatment), or 2 h after (Post-treatment) the beginning of PA treatment; all of the cells were treated with PA for 24 h except for the cells in the control group. Images were captured following cell treatments using a microscope. Scale bar, 200  $\mu$ m. RSG, rosiglitazone; PA, palmitic acid.

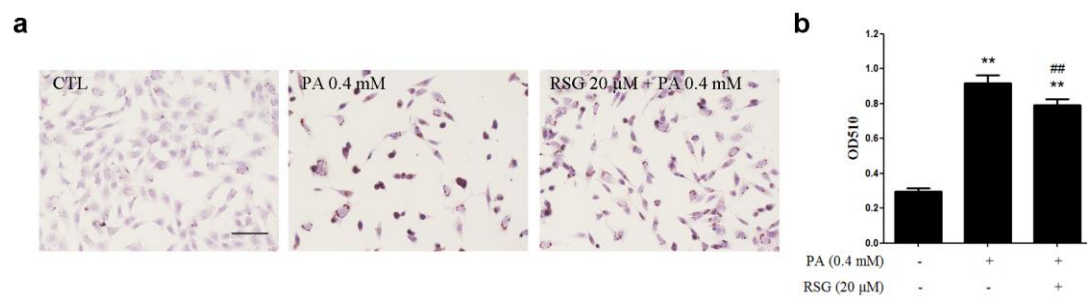

**Figure S2.** Post-treatment with RSG alleviates PA-induced lipid accumulation in TM4 cells. **(a)** ORO staining of TM4 cells. Cells were treated with 0.4 mM PA for 2 h, and then treated with both 0.4 mM PA and 20 μM RSG for 24 h. Scale bar, 100 μm. **(b)** Quantification of neutral lipids in cells stained with ORO. Data are presented as the mean  $\pm$  standard deviation of three independently prepared samples, each with three measurements. \*\* $P < 0.01$  vs. control group; ## $P < 0.01$  vs. 0.4 mM-PA group. RSG, rosiglitazone; PA, palmitic acid; ORO, oil red O.
